# Supplementary material for: The Effect of the COVID-19 Vaccine on Daily Cases and Deaths Based on Global Vaccine Data
Source: MDPI journal article supplement (doi:10.3390/vaccines9111328), 2021-11-15
Supplement: s1 [file s1]

**Table S1: The first and last top 10 countries to start vaccinating**

|              | <b>Country abbr</b> | <b>Country name</b> | <b>Continent</b> | <b>Start date</b> | <b>People vaccinated</b> |
|--------------|---------------------|---------------------|------------------|-------------------|--------------------------|
| First top 10 | ISR                 | Israel              | Asia             | 2020-12-20        | 7435                     |
|              | USA                 | United States       | North America    | 2020-12-20        | 556208                   |
|              | RUS                 | Russia              | Europe           | 2020-12-22        | 52000                    |
|              | BHR                 | Bahrain             | Asia             | 2020-12-23        | 38965                    |
|              | CHL                 | Chile               | South America    | 2020-12-24        | 420                      |
|              | MEX                 | Mexico              | North America    | 2020-12-24        | 2924                     |
|              | AUT                 | Austria             | Europe           | 2020-12-27        | 732                      |
|              | CZE                 | Czechia             | Europe           | 2020-12-27        | 1251                     |
|              | DEU                 | Germany             | Europe           | 2020-12-27        | 24494                    |
|              | DNK                 | Denmark             | Europe           | 2020-12-27        | 6375                     |
| Last top 10  | DJI                 | Djibouti            | Africa           | 2021-04-17        | 10246                    |
|              | LBY                 | Libya               | Africa           | 2021-04-17        | 750                      |
|              | LSO                 | Lesotho             | Africa           | 2021-04-17        | 16000                    |
|              | NER                 | Niger               | Africa           | 2021-04-17        | 1366                     |
|              | SOM                 | Somalia             | Africa           | 2021-04-17        | 117567                   |
|              | TON                 | Tonga               | Oceania          | 2021-04-16        | 500                      |
|              | FJI                 | Fiji                | Oceania          | 2021-04-15        | 27705                    |
|              | SSD                 | South Sudan         | Africa           | 2021-04-15        | 947                      |
|              | ZMB                 | Zambia              | Africa           | 2021-04-15        | 106                      |
|              | COG                 | Congo               | Africa           | 2021-04-14        | 14297                    |

Country abbr: ISO 3166-1 alpha-3 – three-letter country codes

**Table S2: Top 10 countries in proportion of fully vaccinated with population more than 100000**

| <b>Country abbr</b> | <b>Country name</b>  | <b>Continent</b> | <b>People fully vaccinated</b> | <b>Population</b> | <b>Proportion(%)</b> |
|---------------------|----------------------|------------------|--------------------------------|-------------------|----------------------|
| ISR                 | Israel               | Asia             | 5008438                        | 8655541           | 57.86                |
| ARE                 | United Arab Emirates | Asia             | 3836521                        | 9890400           | 38.79                |
| CHL                 | Chile                | South            | 6162713                        | 19116209          | 32.24                |
| BHR                 | Bahrain              | Asia             | 516480                         | 1701583           | 30.35                |
| USA                 | United States        | North            | 93078040                       | 331002647         | 28.12                |
| JEY                 | Jersey               | Europe           | 27772                          | 101073            | 27.48                |
| MLT                 | Malta                | Europe           | 99574                          | 441539            | 22.55                |
| SRB                 | Serbia               | Europe           | 1303093                        | 6804596           | 19.15                |
| ABW                 | Aruba                | North            | 19928                          | 106766            | 18.67                |
| GBR                 | United Kingdom       | Europe           | 12071810                       | 67886004          | 17.78                |

Country abbr: ISO 3166-1 alpha-3 – three-letter country codes

**Table S3: Proportion of fully vaccinated with population more than 100000000**

| <b>Country abbr</b> | <b>Country name</b> | <b>Continent</b> | <b>People fully vaccinated</b> | <b>Population</b> | <b>Proportion(%)</b> |
|---------------------|---------------------|------------------|--------------------------------|-------------------|----------------------|
| USA                 | United States       | North            | 93078040                       | 331002647         | 28.12                |
| BRA                 | Brazil              | South            | 11042940                       | 212559409         | 5.20                 |
| RUS                 | Russia              | Europe           | 6767873                        | 145934460         | 4.64                 |
| MEX                 | Mexico              | North            | 5646105                        | 128932753         | 4.38                 |
| IDN                 | Indonesia           | Asia             | 6699327                        | 273523621         | 2.45                 |
| IND                 | India               | Asia             | 21443345                       | 1380004385        | 1.55                 |
| BGD                 | Bangladesh          | Asia             | 2155296                        | 164689383         | 1.31                 |
| JPN                 | Japan               | Asia             | 849051                         | 126476458         | 0.67                 |
| PHL                 | Philippines         | Asia             | 214792                         | 109581085         | 0.20                 |

Country abbr: ISO 3166-1 alpha-3 – three-letter country code

**Table S4: Top 20 countries and regions in proportion of fully vaccinated**

| <b>Country<br/>abbr</b> | <b>Country<br/>name</b>        | <b>continent</b> | <b>People fully<br/>vaccinated</b> | <b>Population</b> | <b>Proportion(%)</b> |
|-------------------------|--------------------------------|------------------|------------------------------------|-------------------|----------------------|
| GIB                     | Gibraltar                      | Europe           | 31999                              | 33691             | 94.97789             |
| ISR                     | Israel                         | Asia             | 5008438                            | 8655541           | 57.86395             |
| SYC                     | Seychelles                     | Africa           | 54668                              | 98340             | 55.59081             |
| FLK                     | Falkland<br>Islands            | South<br>America | 1775                               | 3483              | 50.96181             |
| CYM                     | Cayman<br>Islands              | North<br>America | 28988                              | 65720             | 44.10834             |
| ARE                     | United Arab<br>Emirates        | Asia             | 3836521                            | 9890400           | 38.79035             |
| BMU                     | Bermuda                        | North<br>America | 22243                              | 62273             | 35.71853             |
| CHL                     | Chile                          | South<br>America | 6162713                            | 19116209          | 32.23815             |
| BHR                     | Bahrain                        | Asia             | 516480                             | 1701583           | 30.35291             |
| USA                     | United States                  | North<br>America | 93078040                           | 331002647         | 28.12003             |
| MCO                     | Monaco                         | Europe           | 10859                              | 39244             | 27.67047             |
| JEY                     | Jersey                         | Europe           | 27772                              | 101073            | 27.47717             |
| TCA                     | Turks and<br>Caicos<br>Islands | North<br>America | 10000                              | 38718             | 25.82778             |
| SMR                     | San Marino                     | Europe           | 8657                               | 33938             | 25.50828             |
| MLT                     | Malta                          | Europe           | 99574                              | 441539            | 22.55158             |
| GGY                     | Guernsey                       | Europe           | 13618                              | 67052             | 20.30961             |
| SRB                     | Serbia                         | Europe           | 1303093                            | 6804596           | 19.15019             |
| ABW                     | Aruba                          | North<br>America | 19928                              | 106766            | 18.66512             |
| IMN                     | Isle of Man                    | Europe           | 15657                              | 85032             | 18.41307             |
| GBR                     | United<br>Kingdom              | Europe           | 12071810                           | 67886004          | 17.78247             |

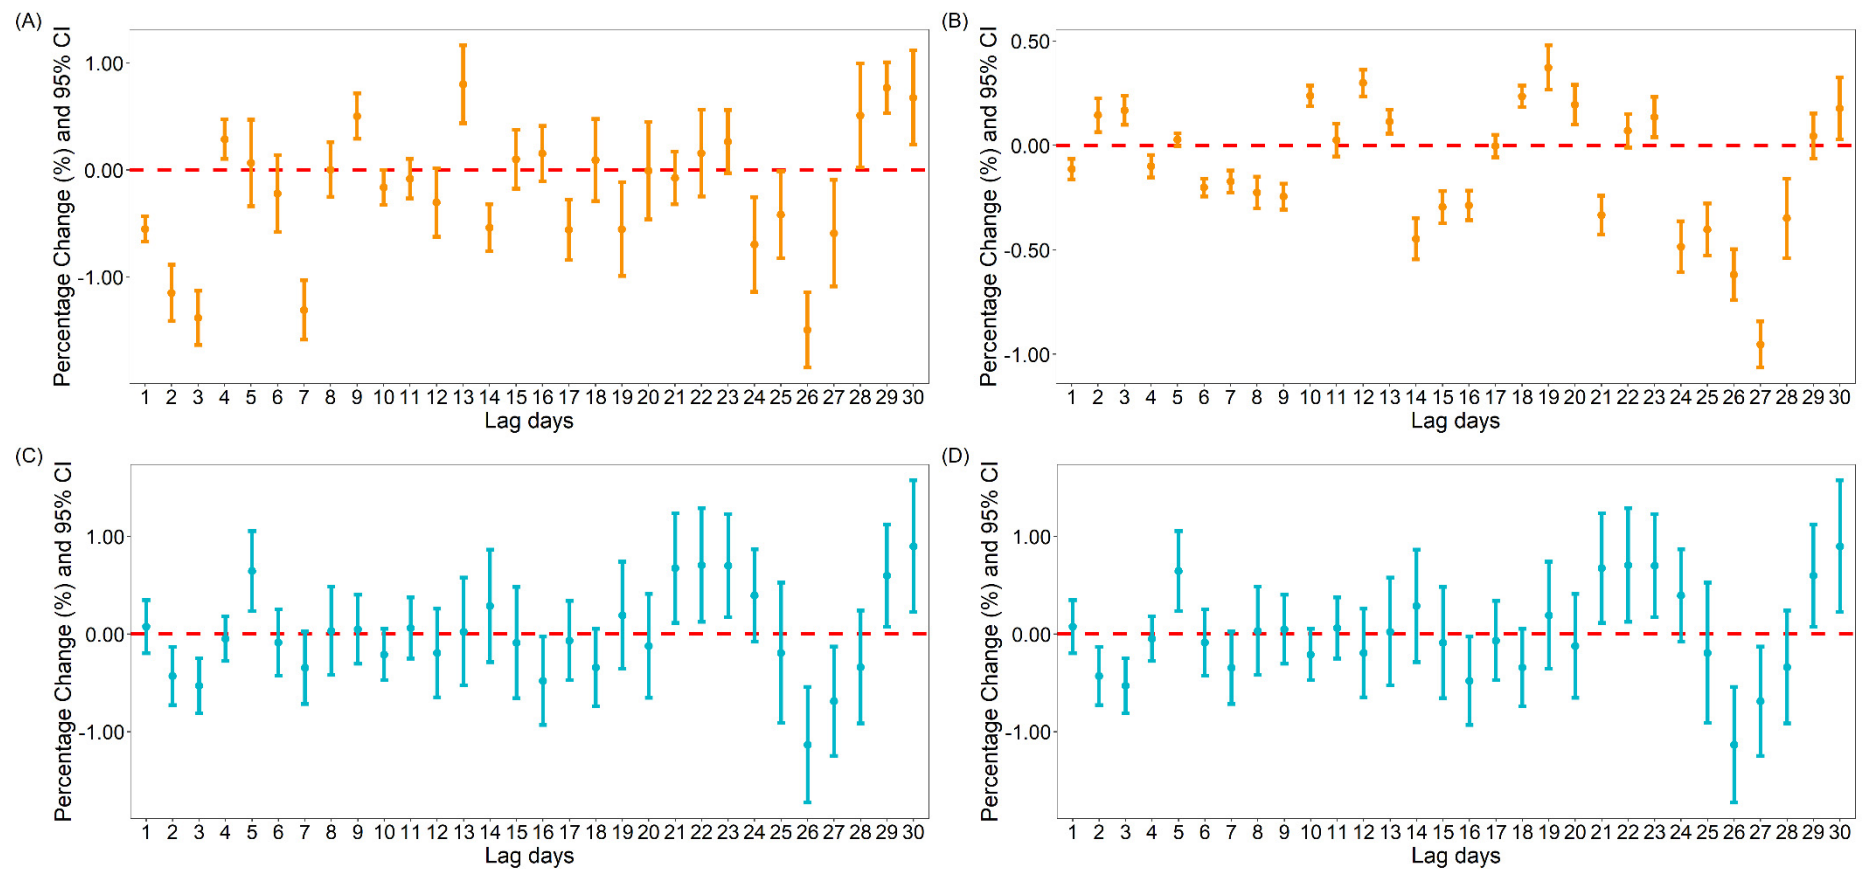

**Figure S1: Percentage change of daily cases and deaths with single lag globally.**

- (A):** Percentage change of daily cases with daily 10 thousand people fully vaccinated increasing;
- (B):** Percentage change of daily cases with daily 10 thousand people vaccinated increasing;
- (C):** Percentage change of daily deaths with daily 10 thousand people fully vaccinated increasing;
- (D):** Percentage change of daily deaths with daily 10 thousand people vaccinated increasing;

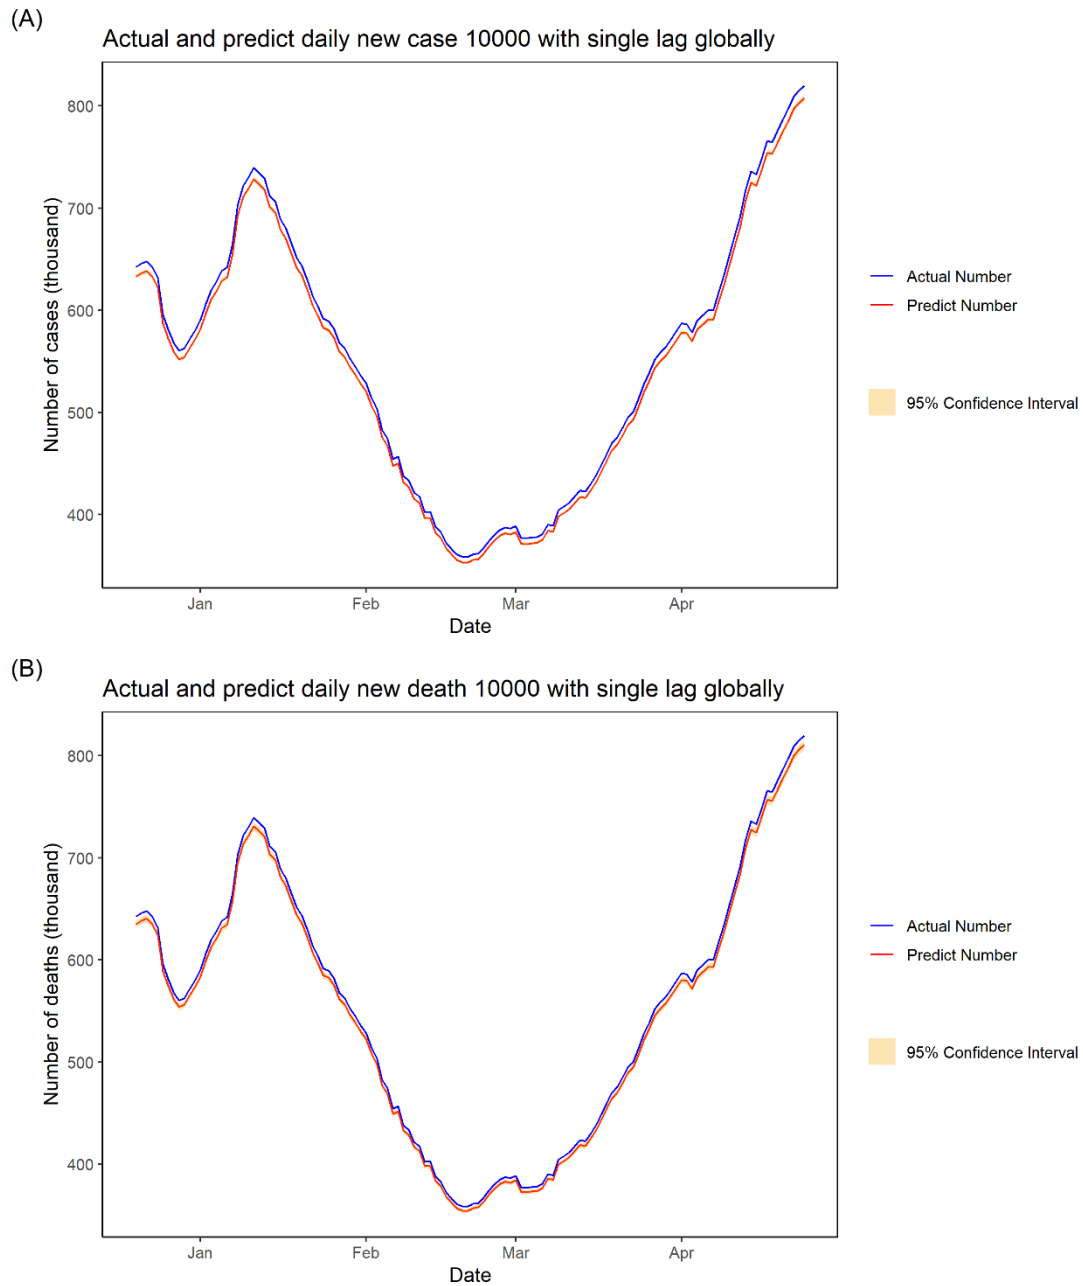

**Figure S2: The actual and predict daily cases and deaths number with single lag globally.**

The predict number was calculated by multiplying the actual number of daily cases by the PC value of the best lag.

(A): The PC value and related 95%CI is -1.50 [-1.85, -1.43] with best single lag of 26.

(B): The PC value and related 95%CI is -1.14 [-1.73, -0.54] with best single lag of 26.

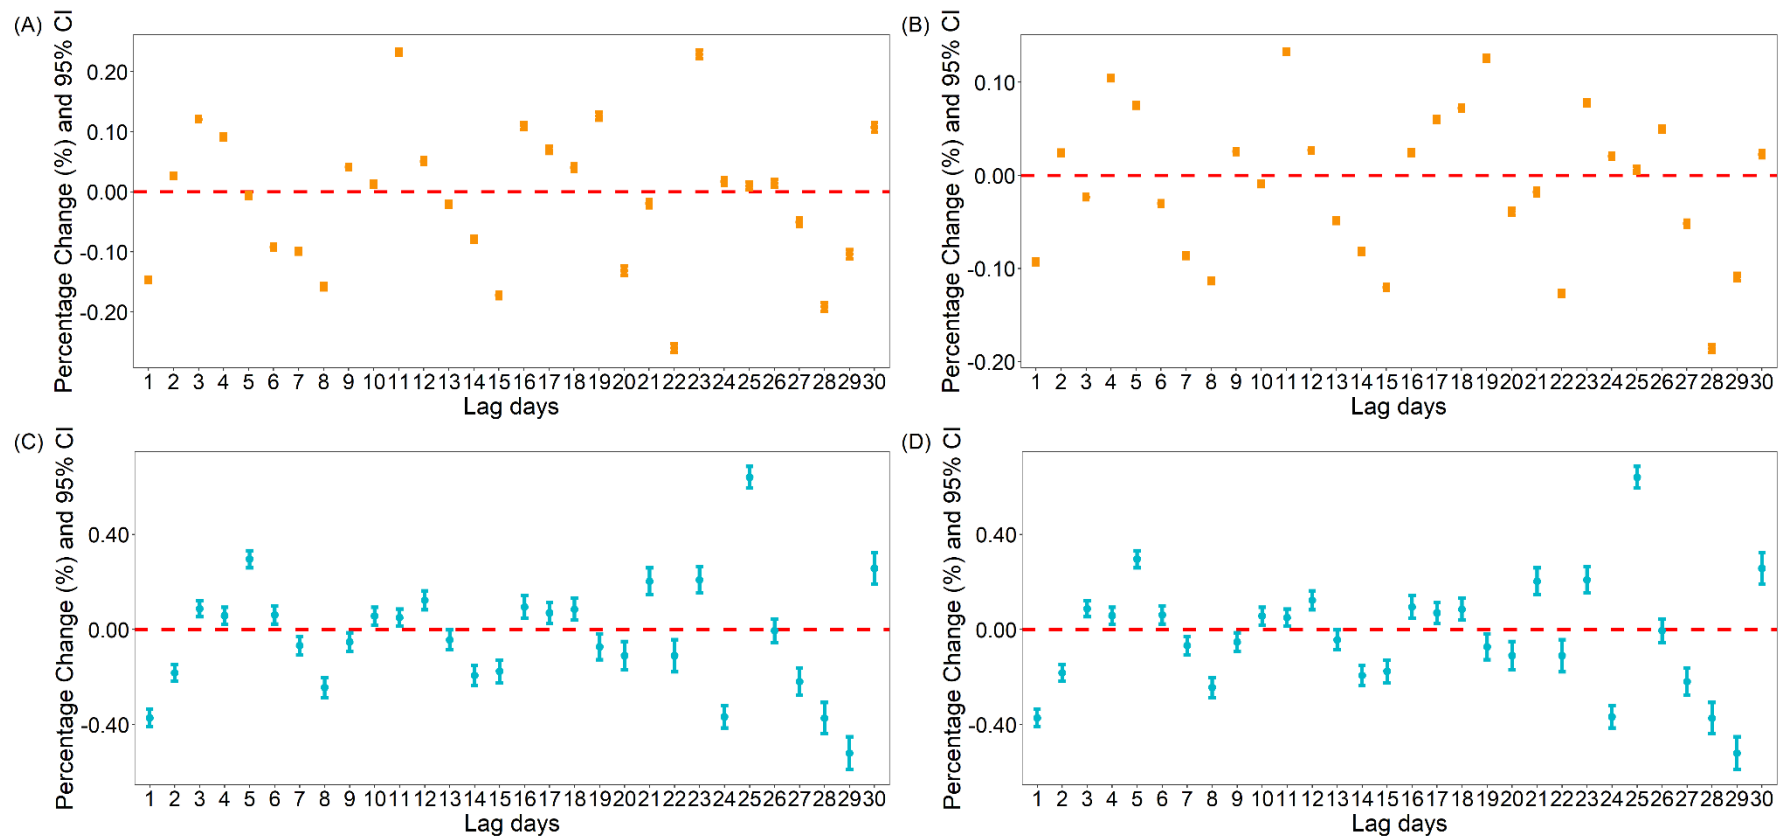

**Figure S3: Percentage change of daily cases and deaths with single lag in US.**

- (A): Percentage change of daily cases with daily 10 thousand people fully vaccinated increasing;  
 (B): Percentage change of daily cases with daily 10 thousand people vaccinated increasing;  
 (C): Percentage change of daily deaths with daily 10 thousand people fully vaccinated increasing;  
 (D): Percentage change of daily deaths with daily 10 thousand people vaccinated increasing;

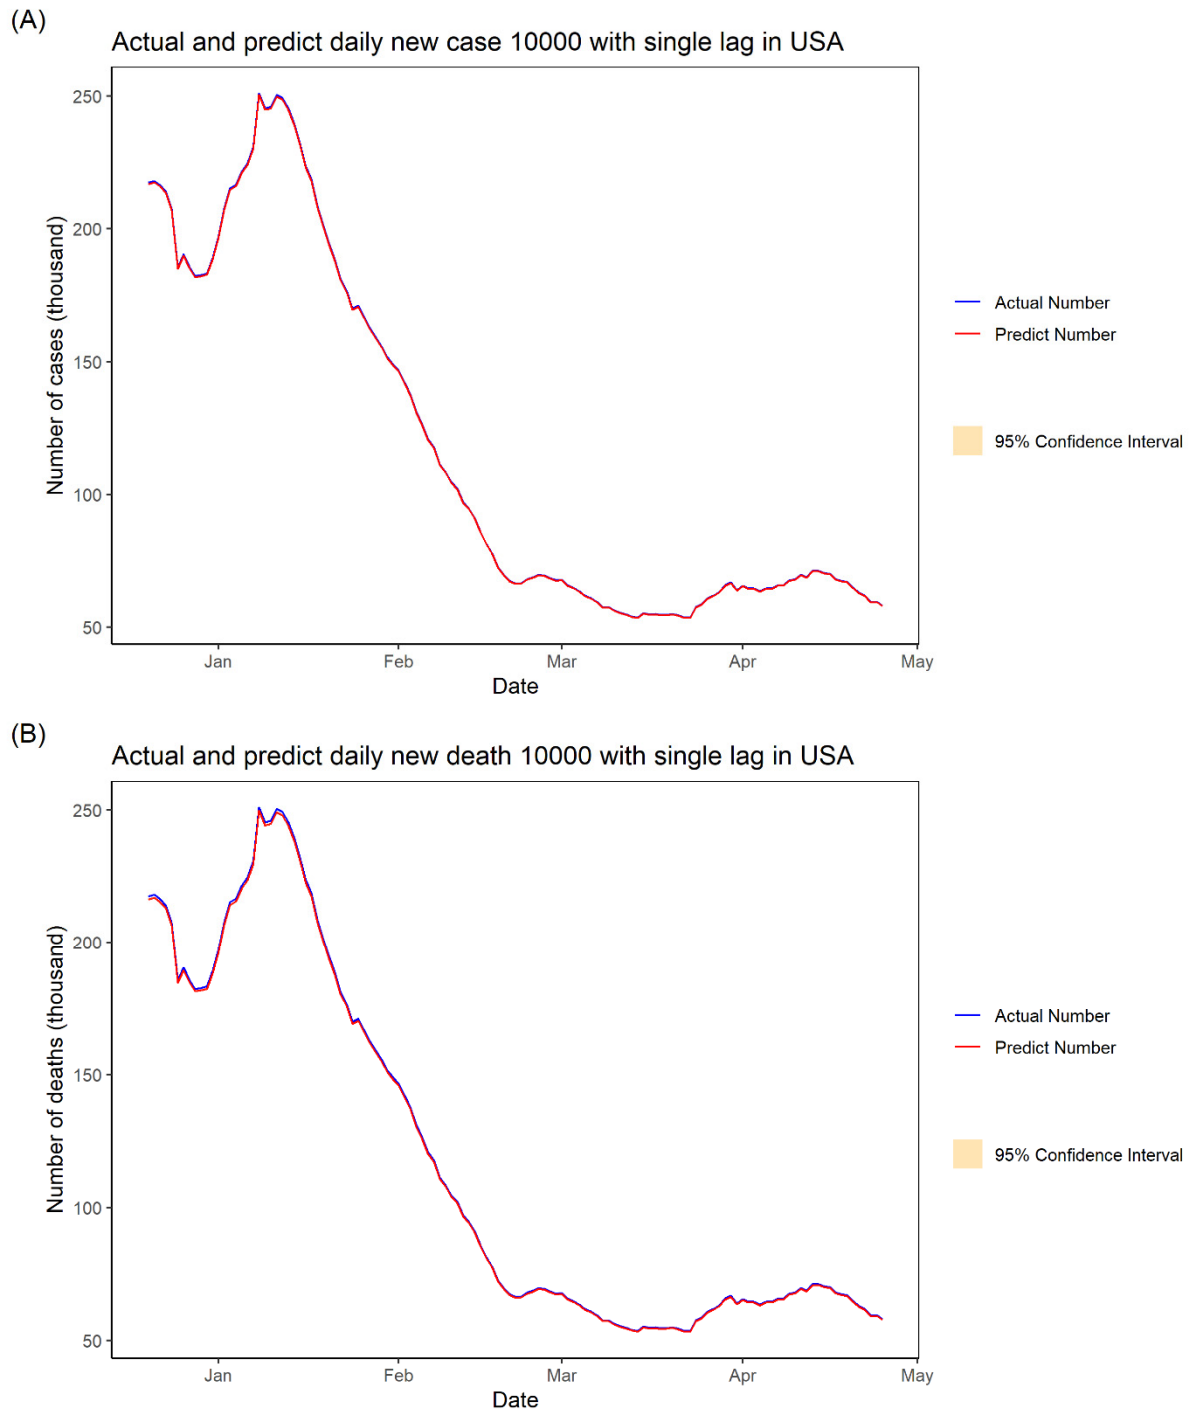

**Figure S4: The actual and predict daily cases and deaths number in US.**

The predict number was calculated by multiplying the actual number of daily cases by the PC value of the best lag.

(A): The PC value and related 95%CI is -0.26 [-0.27, -0.25] with best single lag of 22.

(B): The PC value and related 95%CI is -0.52 [-0.59, -0.45] with best single lag of 29.
